# Supplementary material for: Sex Chromosomes and Sex Phenotype Contribute to Biased DNA Methylation in Mouse Liver
Source: MDPI journal article supplement (doi:10.3390/cells9061436), 2020-06-09
Supplement: s1 [file s1]

**Table S2. List of pyrosequencing assays used for validation**

| Assay          | CG position   | Functional annotation         | Tool              | Comparison                                            | Primer 1 (5'-3')               | Primer 2 (5'-3')<br>biotinylated | Sequencing primer (5'-3') |
|----------------|---------------|-------------------------------|-------------------|-------------------------------------------------------|--------------------------------|----------------------------------|---------------------------|
| <i>Aldh3b3</i> | 19:3,955,095  | 3kb upstream of TSS, enhancer | MethylKit         | XXF vs XYM                                            | TTTTGGTGGTTGTAGATAGTGGT        | TAATTACCCCCCCCCCTACAAT           | GTAGATAGTGGTTGGTA         |
| <i>Bcl6</i>    | 16:24,010,090 | intergenic                    | MethylKit         | XYF vs XYM                                            | AGTAAGTATTTGAAGGTTTGTAGAGT     | ATTCAAAAATTAAACCACTCATAAACATAC   | GGTTTGTAGAGTTTATAGTATATT  |
| <i>Caprin1</i> | 2:103,766,583 | exon                          | MethylKit         | XXF vs XYM<br>XXF vs XYF                              | TTAAGTAAGGGTGAGGAATTT          | AAAAAACTATTTTCATCCCATAAAAACAA    | TGTATTGTGTGTAAGGTTT       |
| Ch6qA1         | 6:13,714,975  | intergenic                    | MethylKit         | XXF vs XYM<br>XXF vs XYF                              | GTTATGGAGGTTGGTAATAATGTT       | ACCAATAAAAAATCAAACAATTCACAAA     | GGGGAATATATAGAAAGATATAAAA |
| <i>Comt</i>    | 16:18,407,984 | exon enhancer                 | DSS               | XXF vs XYM<br>XYF vs XYM                              | AAGGGGAAGGTGTTTTAGTTGATAATG    | TTCTCCAAACCCTCCACCATTTTCATA      | GGTGTTTTTAGTTGATAATGT     |
| <i>Cyp7b1</i>  | 3:18,239,446  | intron                        | MethylKit and DSS | XXF vs XYM<br>XYF vs XYM                              | GGTTATAAGGTTTGTGATATGTGTGTA    | ATTCTTAACCAACTCTCTAATATACAAT     | GGTTTGTGATATGTTGTATAG     |
| <i>Ergic1</i>  | 17:26,634,198 | intron                        | DSS               | XYF vs XYM                                            | AAAGAAGTATTAGGGATAATTTAGGGTAAG | TAACTCAAAATACACCCCTCACC          | GGGATAATTTAGGGTAAGAG      |
| <i>Esr1</i>    | 10:4,729,743  | intron                        | MethylKit and DSS | XYF vs XYM                                            | TTGGGGTTAATTATTTATTTGTGAGT     | TCCCAAAAACACATTCCAATAAC          | TGAGTTATTGGGTTGG          |
| <i>Gstp1</i>   | 19:4,034,872  | downstream                    | MethylKit and DSS | XXF vs XYM<br>XYF vs XYM                              | GTTTTGGTTGTTTTGGAATTTATTATGT   | AAATTTCTCTCCTTAACCTCAATATTCT     | ATTTATTATGTAAATTAGGTTGG   |
| <i>Hsd3b5</i>  | 3:98,626,053  | intron                        | MethylKit         | XXF vs XYM<br>XYF vs XYM                              | TTGTAGATATTGAATAGATATTAGGGAATT | CTTCCCCAACTTACTTCTTAATCATA       | ATTGAATAGATATTAGGGAATTTT  |
| <i>Pgk1</i>    | X:106,187,981 | intron, promoter              | DSS               | XX <sup>padF</sup> vs XOF                             | TTAGTAATTTTTTTAGGTAAGGGAGAAGT  | TTAAACTCCTAACCCTAAATTTACATCA     | GTGAGGTTATAGGTTTTTAAT     |
| <i>Snrpn</i>   | 7:60,005,146  | promoter                      | n/a               | n/a                                                   | TTGGTAGTTGTTTTTTGGTAGGAT       | TCCACAAACCCAACCTAACCTTC          | GTGTAGTTATTGTTTGGGAT      |
| <i>Xist</i>    | X:103,481,082 | exon, promoter                | DSS               | XX <sup>padF</sup> vs XOF<br>XXF vs XYM<br>XXF vs XYF | GTAATAGTTATGGGGTAGATTTTGGA     | CTTAACCTCTAATTTAACCACACTAA       | ATTTAGTAGGTTTAGAGAAAT     |

**CG position:** UCSC genome browser - mouse GRCm38/mm10 Assembly

**Functional annotation:** Based on genomic region and histone marks enrichment (H3K4me1, H3k27ac for enhancers and H3k4me3 for promoters).

Information obtained from UCSC genome browser ([Bing Ren's laboratory](#) - LIRC histone track).
