# Supplementary material for: Sex Chromosomes and Sex Phenotype Contribute to Biased DNA Methylation in Mouse Liver
Source: MDPI journal article supplement (doi:10.3390/cells9061436), 2020-06-09
Supplement: s1 [file s1]

**Table S1. List of samples used in WGBS and RNA-seq experiments**

| <b>ID</b>   | <b>GROUP</b>         | <b>ALT</b>                  | <b>WGBS</b> | <b>RNA-SEQ</b> |
|-------------|----------------------|-----------------------------|-------------|----------------|
| <b>XO1</b>  | XO female            | XO.F                        | yes         | no             |
| <b>XO2</b>  | XO female            | XO.F                        | yes         | no             |
| <b>XO3</b>  | XO female            | XO.F                        | yes         | no             |
| <b>XO4</b>  | XO female            | XO.F                        | no          | yes            |
| <b>XO5</b>  | XO female            | XO.F                        | no          | yes            |
| <b>XO6</b>  | XO female            | XO.F                        | no          | yes            |
| <b>XO7</b>  | XO female            | XO.F                        | no          | yes            |
| <b>XX4</b>  | XX <i>Paf</i> female | XX <sup><i>Paf</i></sup> .F | yes         | no             |
| <b>XX5</b>  | XX <i>Paf</i> female | XX <sup><i>Paf</i></sup> .F | no          | yes            |
| <b>XX6</b>  | XX <i>Paf</i> female | XX <sup><i>Paf</i></sup> .F | yes         | no             |
| <b>XX10</b> | XX <i>Paf</i> female | XX <sup><i>Paf</i></sup> .F | no          | yes            |
| <b>XX11</b> | XX <i>Paf</i> female | XX <sup><i>Paf</i></sup> .F | no          | yes            |
| <b>XX16</b> | XX <i>Paf</i> female | XX <sup><i>Paf</i></sup> .F | no          | yes            |
| <b>XX17</b> | XX <i>Paf</i> female | XX <sup><i>Paf</i></sup> .F | no          | yes            |
| <b>XX7</b>  | XX female            | XX.F                        | yes         | no             |
| <b>XX8</b>  | XX female            | XX.F                        | yes         | yes            |
| <b>XX9</b>  | XX female            | XX.F                        | yes         | no             |
| <b>XX13</b> | XX female            | XX.F                        | no          | yes            |
| <b>XX14</b> | XX female            | XX.F                        | no          | yes            |
| <b>XX15</b> | XX female            | XX.F                        | no          | yes            |
| <b>XY1</b>  | XY female            | XY.F                        | yes         | no             |
| <b>XY2</b>  | XY female            | XY.F                        | yes         | no             |
| <b>XY3</b>  | XY female            | XY.F                        | yes         | yes            |
| <b>XY4</b>  | XY female            | XY.F                        | no          | yes            |
| <b>XY6</b>  | XY female            | XY.F                        | no          | yes            |
| <b>XY7</b>  | XY female            | XY.F                        | no          | yes            |
| <b>XY10</b> | XY male              | XY.M                        | yes         | yes            |
| <b>XY11</b> | XY male              | XY.M                        | yes         | no             |
| <b>XY12</b> | XY male              | XY.M                        | yes         | no             |
| <b>XY13</b> | XY male              | XY.M                        | no          | yes            |
| <b>XY14</b> | XY male              | XY.M                        | no          | yes            |
| <b>XY15</b> | XY male              | XY.M                        | no          | yes            |
